# Triggers and Interventions of Patients Who Require Medical Emergency Team Reviews: A Cross-Sectional Analysis of Single Versus Multiple Reviews

Gobnait Byrne, PhD  
Shauna Ennis, MSc  
Anne Marie Barnes, MSc  
Patricia Morrison, MSc  
Siobhan Connors, PG Dip Crit Care  
Mary B. Quirke, PhD

**BACKGROUND** Medical emergency teams constitute part of the escalation protocol of early warning systems in many hospitals. The literature indicates that medical emergency teams may reduce hospital mortality and cardiac arrest. A greater understanding of pathways of patients who experience multiple medical emergency team reviews will inform clinical decision-making.

**OBJECTIVES** To explore differences between patients who require a single medical emergency team review and those who require multiple reviews, and to identify any differences between patients who were reviewed only once during admission and patients who required multiple reviews.

**METHODS** Data for this retrospective cross-sectional review, including demographic data, call triggers, outcomes, and interventions, were routinely collected from January 2013 through December 2015. The study adhered to the Strengthening the Reporting of Observational Studies in Epidemiology (STROBE) collaborative's cross-sectional studies checklist (version 4).

**RESULTS** Of 54 787 admitted patients, 1274 (2%) required a call to a medical emergency team; of those, 260 patients (20%) needed multiple calls. Patients requiring multiple calls demonstrated higher mortality (odds ratio, 1.49 [95% CI, 1.12-1.98]). A logistic regression model identified surgical patients and those receiving antibiotics and respiratory interventions at the first medical emergency team review as being more likely to require multiple reviews. Patients transferred to a higher level of care after the first review were less likely to require another review.

**CONCLUSIONS** Patients requiring multiple medical emergency team reviews have higher mortality. Surgical patients have a higher risk of requiring multiple reviews. Hospitals need to include more details on surgical patients when auditing medical emergency team activation. (*Critical Care Nurse*. 2021;41[4]:e1-e10)

**F**ailure to rescue inpatients experiencing acute clinical deterioration has been extensively reported in the literature.<sup>1-3</sup> Track and trigger systems have been widely introduced to enable skilled staff to recognize patient deterioration early and provide a timely response.<sup>4,5</sup> The National Clinical Effectiveness Committee in the Republic of Ireland developed national guidelines for early recognition of the deteriorating adult patient,<sup>6</sup> a maternity version for pregnant women (Maternity Early Warning System),<sup>7</sup> and one specifically for children (Paediatric Early Warning System).<sup>8</sup> Nurses generate an Early Warning Score (EWS) for all

adult patients within acute care hospitals, and when a patient's vital signs fall out-

**Patients with repeat calls had a longer length of hospital stay and higher overall mortality than patients who had a single MET call during admission.**

side of the acceptable range, an associated escalation protocol prompts staff to seek a medical review and increase monitoring on the basis of the score.<sup>6</sup> During the implementation of the EWS, each hospital independently developed its own escalation protocol, and some hospitals opted to have the primary medical team respond to events (conventional care). A few hospitals in Ireland introduced a medical emergency team (MET) as part of the escalation protocol; this team would respond to cases

of an elevated EWS.<sup>9,10</sup> Medical emergency teams are known as critical care outreach in the United Kingdom and rapid response teams in the United States.

Internationally, METs have been widely adopted to respond to acute deterioration of patients in clinical wards.<sup>2,11,12</sup> In many cases, METs reduce the incidence of hospital mortality and of cardiac arrest among inpatients.<sup>12,13</sup> Medical emergency teams can be a multidisciplinary team or be made up of physicians or nurses, depending on the context.<sup>12,14</sup> The composition of the team does not seem to affect its effectiveness.<sup>1,13</sup> Although overall these teams lead to improved patient outcomes, few research studies have examined the pathways of patients who require multiple reviews by a MET.

## Background

One of the first evaluations of METs identified that 17% (21 of 124) of patients reviewed by a MET required more than 1 review during a hospital admission.<sup>15</sup> In a larger Australian study of 8203 MET calls, this figure was higher: 26%.<sup>16</sup> This variance continues in different contexts. For example, investigators in a Danish study showed that METs performed multiple reviews of 17% (34 of 206) of patients.<sup>17</sup> One New Zealand study reported a much lower proportion of multiple MET reviews (11%),<sup>18</sup> whereas another New Zealand study identified a higher percentage: 19% (120 of 630 MET reviews).<sup>19</sup> Fernando et al<sup>20</sup> analyzed all MET calls in 2 Canadian hospitals between 2012 and 2016; they found that the percentage of multiple MET activations was 20% (1183 of 5995) of calls. Thus, the prevalence of multiple MET reviews varies from 11% to 26%.

In an Australian study of 308 MET reviews, researchers found that 80% of patients who were reviewed by a MET did not require transfer to a higher level of care.<sup>16</sup> Of patients who remained on the ward, 13% received a second review by a MET within 24 hours of the initial call, suggesting that this subgroup of patients required additional care. Stelfox et al<sup>21</sup> compared outcomes of Canadian patients with a single MET call and those with multiple MET calls (excluding patients who were admitted to an intensive care unit [ICU] or patients who had limitations on medical treatment, such as no admission to an ICU after the initial MET call). Stelfox et al categorized 10% (337 of 3200) of calls as repeat MET calls. Patients with repeat calls had a longer length of hospital stay and higher overall mortality than patients who had

## Authors

Gobnait Byrne is Director, Trinity Centre for Practice and Healthcare Innovation, and an assistant professor, School of Nursing and Midwifery, Trinity College Dublin, Dublin, Ireland.

Shauna Ennis is Head of Learning and Development, Tallaght University Hospital, Dublin, Ireland.

Anne Marie Barnes is the Emergency Response System Coordinator, Tallaght University Hospital.

Patricia Morrison is the Assistant Director of Nursing and Lead Assistant Director of Nursing for the Perioperative Directorate, Tallaght University Hospital.

Siobhan Connors is a critical care outreach nurse, Tallaght University Hospital.

Mary B. Quirke is a research fellow, Trinity Centre for Practice and Healthcare Innovation, School of Nursing and Midwifery, Trinity College Dublin.

Corresponding author: Gobnait Byrne, PhD, Trinity Centre for Practice and Healthcare Innovation, School of Nursing and Midwifery, Trinity College Dublin, 24 D'Olier St, Dublin 2, Ireland (email: gobnait.byrne@tcd.ie).

To purchase electronic or print reprints, contact the American Association of Critical-Care Nurses, 27071 Aliso Creek Rd, Aliso Viejo, CA 92656. Phone, (800) 899-1712 or (949) 362-2050 (ext 532); fax, (949) 362-2049; email, reprints@aacn.org.

**Table 1** Indicators comprising the Early Warning Score

| Indicators                    | Early Warning Score |        |           |           |           |        |                    |
|-------------------------------|---------------------|--------|-----------|-----------|-----------|--------|--------------------|
|                               | 3                   | 2      | 1         | 0         | 1         | 2      | 3                  |
| Respiratory rate, breaths/min | ≤8                  |        | 9-11      | 12-20     |           | 21-24  | ≥25                |
| SpO <sub>2</sub> , %          | ≤91                 | 92-93  | 94-95     | ≥96       |           |        |                    |
| Fraction of inspired oxygen   |                     |        |           | Air       |           |        | Any O <sub>2</sub> |
| Systolic BP, mm Hg            | ≤90                 | 91-100 | 101-110   | 11-249    | ≥250      |        |                    |
| Heart rate, beats/min         |                     | ≤40    | 41-50     | 51-90     | 91-110    | 11-130 | ≥131               |
| AVPU scale                    |                     |        |           | A         |           |        | V, P, U            |
| Temperature, °C               | ≥35.0               |        | 35.1-36.0 | 36.1-38.0 | 38.1-39.0 | ≥39.1  |                    |

Abbreviations: AVPU, alert, verbal, pain, unresponsive; BP, blood pressure; O<sub>2</sub>, oxygen.

a single MET call during admission.<sup>21</sup> The same outcome was observed in other studies.<sup>20</sup> In a similar single-site comparison study, patients who had multiple MET reviews (23%, *n* = 374) were more likely to be surgical patients with gastrointestinal disease and to have higher mortality and a longer hospital stay than patients with a single MET call (77%, *n* = 1290).<sup>22</sup> In contrast, a recent study indicated that patients admitted via the surgical service were less likely than patients admitted via non-surgical services to require multiple MET reviews.<sup>20</sup>

As these studies indicate, findings are mixed regarding patients at greatest risk of requiring multiple reviews by a MET. In this article, we ascertain the prevalence of patients who have multiple MET reviews during their admission in an acute care hospital in Ireland and identify the key characteristics of patients requiring multiple reviews during their hospital stay.

## Methods

In this study, we performed a retrospective cross-sectional review of hospital data. Anonymized data are routinely collected as part of the hospital's MET system; we analyzed the data collected during the period January 2013 through December 2015. To minimize sample bias, we included all cases in which patients experienced at least 1 MET call during an admission and were discharged before January 2016. The ethics committee at the study site provided ethical approval. This ethics committee is approved by the Department of Health in Ireland and provides ethical review of clinical trials of medicinal products as required under European Communities Regulations (S.I. number 190/2004). The study adhered to the STROBE (Strengthening the Reporting of

Observational Studies in Epidemiology) checklist for cross-sectional studies.<sup>23</sup>

This study was conducted throughout the adult services of an Irish acute care teaching hospital, with 500 adult inpatient beds and 14 higher-level care beds (HLCBs). Approximately 50 000 patients presented to this hospital's emergency department during 2016; the hospital had 18 359 admissions. The hospital has used a track and trigger system and the EWS since July 2012, and its escalation protocol has included activation of a MET when a patient's EWS reaches 7 (or a score of 3 for a single vital sign<sup>6</sup>; Tables 1 and 2). Respiratory rate, heart rate, and temperature measurements are incorporated into the EWS. Staff are encouraged to contact the MET if a patient meets criteria for a diagnosis of sepsis or if they have a "clinical concern" about a patient in the absence of a specific trigger. The MET team has a specific pager number and is available 24 hours per day. At the time of the study, members of the MET included a medical/cardiology registrar (fellow), an anesthetist, and a critical care/anesthetic nurse. All nursing and medical staff received education (including role-playing during simulated situations) about recognizing and managing acutely ill adults using the EWS, and about using noninvasive ventilation.

We requested anonymized data from the MET data manager for the study period (January 2013 through December 2015). We considered patient data from all MET calls during this period to minimize bias. The data had been collected by the MET team as part of routine care. The MET was well established in the hospital by January 2013, and the process of initiating a MET call was embedded in clinical practice. We excluded data

**Table 2** Observation and next steps required for each Early Warning Score<sup>a</sup>

| Total EWS | Minimum observation frequency | Alert                                                            | Response                                                                                                                                                              |
|-----------|-------------------------------|------------------------------------------------------------------|-----------------------------------------------------------------------------------------------------------------------------------------------------------------------|
| 1         | Every 12 h                    | Nurse in charge                                                  | Nurse in charge reviews if new score = 1                                                                                                                              |
| 2         | Every 6 h                     | Nurse in charge                                                  | Nurse in charge reviews                                                                                                                                               |
| 3         | Every 4 h                     | Nurse in charge and team/on-call SHO (junior physician)          | SHO (junior physician) reviews within 1 h                                                                                                                             |
| 4-6       | Every hour                    | Nurse in charge and clinical team/on-call SHO (junior physician) | SHO reviews within the hour; if no response to treatment within 1 h, contact registrar (fellow)<br>Consider continuous patient monitoring<br>Consider transfer to HLC |
| ≥ 7       | Every 30 min                  | Nurse in charge, clinical team, and MET                          | Registrar (fellow) reviews immediately; MET reviews<br>Plan to transfer to HLC (continuous patient monitoring is recommended)                                         |

Abbreviations: EWS, Early Warning Score; HLC, higher level of care; MET, medical emergency team; SHO, senior house officer.

<sup>a</sup> The EWS is determined by adding the indicator-specific scores described in Table 1. The MET is called if a single parameter score equals 3 or the nurse uses their clinical judgement to determine that a MET review is required.

for patients who were still inpatients in January 2016 and those who were inpatients in the mental health unit or in the children's ward. We also excluded cases missing data for specific variables for analysis.

Each admission during which at least 1 MET call occurred was identified as a case in the database. The database contained the following data: age, sex, length of hospital stay until first MET call, triggers (6 physiological measurements considered in the EWS) leading to the MET call, outcome of the MET call, patient type (ie, medical or surgical), interventions during the MET call, and length of time the MET spent with the patient. Diagnosis and comorbidities at admission, surgery type, and complications were not included in the anonymized database. Because of general data protection regulations, we could not link this database with patient records to obtain this information. We considered the immediate outcome for the patient—whether the patient stayed on the ward or was transferred to an HLCB, an operating theater, or another hospital—to be the outcome of a MET call. The interventions were classified as oxygen therapy, advanced respiratory therapy (noninvasive ventilation, intubation, arterial blood gas), respiratory therapy (nebulizer, chest drain, suctioning, chest radiography), electrocardiography, telemetry, antibiotic therapy, intravenous fluids, blood transfusion, and blood tests, among other investigations (Table 3).

Because our goal in this study was to compare patients who had a single MET call with those who had multiple calls, we used only data from the initial MET call and

final outcome data to compare these 2 groups. We categorized patients as having a “limitation on medical treatment” (LOMT) if they had such a limitation documented, such as “not for ventilation,” “not for resuscitation,” or “not for MET call.”

We analyzed the data using SPSS software (version 22), and for this large sample we used statistics appropriate for bivariate analysis ( $\chi^2$  and Student *t* tests). For logistic regression, the sample size criteria are determined by the number of predictors to the smallest outcome category.<sup>24</sup> In this study, we coded the outcome category as 1 (> 1 MET call during an admission) or 0 (1 MET call during an admission). Logistic regression is not done if the number of responses in the 2 outcome categories (a single review vs multiple reviews) is less than 10 times the predictor variables.<sup>25</sup> Our final model included 4 predictors, and the predictor for the smallest outcome category was 1:65, which is greater than 1:10. Thus we performed logistic regression to determine the significant predictor variables associated with patients who had more than 1 MET call during an admission.

We created 2 logistic regression models: one that included all patients who had an MET call, and one that excluded patients who were categorized as having an LOMT after the first MET call. The 2 models contained 3 significant predictor variables (Tables 4 and 5). The variable medical/surgical specialty was retained in the models because it was important to control for specialty in determining what factors predict who will have more than 1 MET call.

**Table 3** Interventions after the first call to the medical emergency team among patients with 1 call and patients with multiple calls (N=1252)

| Intervention                                                                | Patients with 1 MET call (n=992) | Patients with multiple MET calls (n=260) | Test score         | P                 |
|-----------------------------------------------------------------------------|----------------------------------|------------------------------------------|--------------------|-------------------|
| Oxygen therapy                                                              | 911 (92)                         | 239 (92)                                 | 0.002 <sup>a</sup> | .96               |
| Blood tests                                                                 | 460 (46)                         | 125 (48)                                 | 0.18 <sup>a</sup>  | .67               |
| Antibiotics                                                                 | 148 (15)                         | 58 (22)                                  | 7.70 <sup>a</sup>  | <.01 <sup>b</sup> |
| ECG or telemetry                                                            | 273 (28)                         | 74 (29)                                  | 0.05 <sup>a</sup>  | .82               |
| Arterial catheter or other advanced respiratory therapy                     | 137 (14)                         | 40 (15)                                  | 0.30 <sup>a</sup>  | .58               |
| Respiratory therapy (nebulizer, chest drain, suctioning, chest radiography) | 331 (33)                         | 109 (42)                                 | 6.30 <sup>a</sup>  | <.05 <sup>b</sup> |
| Computed tomography                                                         | 87 (9)                           | 22 (9)                                   | 0.001 <sup>a</sup> | .97               |
| Modification of vital signs in EWS                                          | 16 (2)                           | 1 (0.4)                                  | 1.50 <sup>c</sup>  | .22               |
| Intravenous fluids                                                          | 265 (27)                         | 67 (26)                                  | 0.05 <sup>a</sup>  | .82               |
| Nasogastric tube                                                            | 5 (1)                            | 3 (1)                                    | 0.54 <sup>c</sup>  | .37               |
| Urinary catheter                                                            | 43 (4)                           | 14 (5)                                   | 0.31 <sup>a</sup>  | .58               |
| Central catheter                                                            | 33 (3)                           | 10 (4)                                   | 0.05 <sup>a</sup>  | .83               |
| Physical therapy                                                            | 12 (1)                           | 8 (3)                                    | 3.50 <sup>c</sup>  | .05               |

Abbreviations: ECG, electrocardiography; EWS, Early Warning Score; MET, medical emergency team.

<sup>a</sup>  $\chi^2$  test.<sup>b</sup> Significant.<sup>c</sup> Fisher exact test.**Table 4** Logistic regression predicting the likelihood of multiple calls to the medical emergency team during a single admission

|                                                                                  | Model 1 <sup>a</sup> |           |       | Model 2 <sup>b</sup> |           |      |
|----------------------------------------------------------------------------------|----------------------|-----------|-------|----------------------|-----------|------|
|                                                                                  | OR                   | 95% CI    | P     | OR                   | 95% CI    | P    |
| Medical vs surgical patients                                                     | 0.78                 | 0.58-1.04 | .09   | 0.77                 | 0.57-1.05 | .10  |
| Transferred to an HLCB at first MET call, yes vs no                              | 0.48                 | 0.32-0.72 | <.001 | 0.51                 | 0.33-0.77 | .001 |
| Antibiotic intervention at first MET call, yes vs no                             | 1.45                 | 1.02-2.05 | .04   | 1.56                 | 1.08-2.24 | .02  |
| Chest drain/nebulizers, chest radiography, or suctioning intervention, yes vs no | 1.45                 | 1.09-1.93 | .01   | 1.443                | 1.07-1.95 | .02  |

Abbreviations: HLCB, higher level of care bed; MET, medical emergency team; OR, odds ratio.

<sup>a</sup> Model 1 included all patients. The Constant was 0.28.<sup>b</sup> Model 2 excludes patients who were classified as having a limitation on medical treatment. The Constant was 0.281.**Table 5** Goodness of fit statistics of the logistic regression models

|                      | Model    |    |       | Nagelkere $R^2$ | Hosmer-Lemeshow |    |     | P     |
|----------------------|----------|----|-------|-----------------|-----------------|----|-----|-------|
|                      | $\chi^2$ | df | P     |                 | $\chi^2$        | df | P   |       |
| Model 1 <sup>a</sup> | 29.58    | 4  | <.001 | .036            | 1.9             | 6  | .93 | <.001 |
| Model 2 <sup>b</sup> | 27.6     | 4  | <.001 | .037            | 4.23            | 5  | .52 | <.001 |

<sup>a</sup> Model 1 included all patients.<sup>b</sup> Model 2 included patients who did not have a limitation on medical treatment after the first call to the medical emergency team.



**Table 6** Patients' demographic characteristics (N = 1252)<sup>a</sup>

| Characteristic                                   | Patients with 1 MET review (n=992) | Patients with multiple MET reviews (n=260) | Test score         | P                  |
|--------------------------------------------------|------------------------------------|--------------------------------------------|--------------------|--------------------|
| Age, mean (SD), y                                | 68.8 (16.4)                        | 67.5 (16.5)                                | 1.2 <sup>b</sup>   | .23                |
| Sex                                              |                                    |                                            | 0.007 <sup>c</sup> | .93                |
| Male                                             | 516 (52)                           | 136 (52)                                   |                    |                    |
| Female                                           | 476 (48)                           | 124 (48)                                   |                    |                    |
| Outcome of admission                             |                                    |                                            | 7.13 <sup>c</sup>  | <.01               |
| Discharge                                        | 695 (70)                           | 159 (61)                                   |                    |                    |
| Death                                            | 297 (30)                           | 101 (39)                                   |                    |                    |
| Specialty type                                   |                                    |                                            | 3.3 <sup>c</sup>   | .07                |
| Medical                                          | 683 (69)                           | 163 (63)                                   |                    |                    |
| Surgical                                         | 309 (31)                           | 97 (37)                                    |                    |                    |
| Time between admission and first call to the MET |                                    |                                            | 0.002 <sup>c</sup> | .97                |
| ≤24 hours                                        | 146 (15)                           | 38 (15)                                    |                    |                    |
| >24 hours                                        | 846 (85)                           | 222 (85)                                   |                    |                    |
| Service period                                   |                                    |                                            | 0.07 <sup>c</sup>  | .80                |
| In service <sup>d</sup>                          | 252 (25)                           | 64 (25)                                    |                    |                    |
| Out of hours                                     | 740 (75)                           | 196 (75)                                   |                    |                    |
| LOMT at first call to the MET                    |                                    |                                            | 0.03 <sup>c</sup>  | .86                |
| Yes                                              | 86 (9)                             | 21 (8)                                     |                    |                    |
| No                                               | 906 (91)                           | 239 (92)                                   |                    |                    |
| Transfer to HLCB                                 |                                    |                                            | 12.01 <sup>c</sup> | <.005 <sup>e</sup> |
| Yes                                              | 216 (22)                           | 31 (12)                                    |                    |                    |
| No                                               | 776 (78)                           | 229 (88)                                   |                    |                    |
| Flu season                                       |                                    |                                            | 0.011 <sup>c</sup> | .92                |
| Yes                                              | 551 (55)                           | 146 (56)                                   |                    |                    |
| No                                               | 441 (45)                           | 114 (44)                                   |                    |                    |

Abbreviations: HLCB, higher-level care bed; LOMT, limitation on medical treatment; MET, medical emergency team.

<sup>a</sup> Data are presented as No. (%) unless otherwise stated.

<sup>b</sup> Student *t* test.

<sup>c</sup>  $\chi^2$  test.

<sup>d</sup> Monday through Friday, 9 AM to 5 PM.

<sup>e</sup> Significant.

## Results

We examined data from the period January 1, 2013, through December 31, 2015. During this period, there were 54 787 admissions, of which 1274 (2%) involved at least 1 MET call; however, 1675 MET calls were recorded because some patients required multiple reviews during a single admission. Data were excluded from analysis for patients who required a MET call: 8 patients had not been inpatients at the time of the MET call; and 14 patients had cardiac arrests, and the initial MET call evolved rapidly to a cardiac arrest call. Thus, 1252 admissions triggered at least 1 MET call and were examined in this study. Of these, 992 (79%) patients were reviewed once, and 260 (21%) patients warranted more than 1 MET review during a single admission.

Analysis of patient flow from admission to final outcome (ie, discharge home, transfer to another hospital

and thus outcome unknown, or death) identified that among the 992 patients who were reviewed once by the MET, 216 (22%) were transferred to an HLCB. Only 31 (12%) patients who experienced multiple MET calls were transferred, and more than one-third of those patients (35%) required readmission to an HLCB following the second MET call.

Table 6 presents the demographic data for patients with a single MET call and those with multiple calls. We found no significant difference in the age or sex of patients in these 2 groups, nor in the length of time from admission to the first MET review. The median time between the first and second MET reviews, and between the second and third MET reviews, was 24 hours. Medical patients were less likely to be categorized as having multiple MET calls. The Figure shows the percentage of patients who scored in the 6 physiological measurements that compose

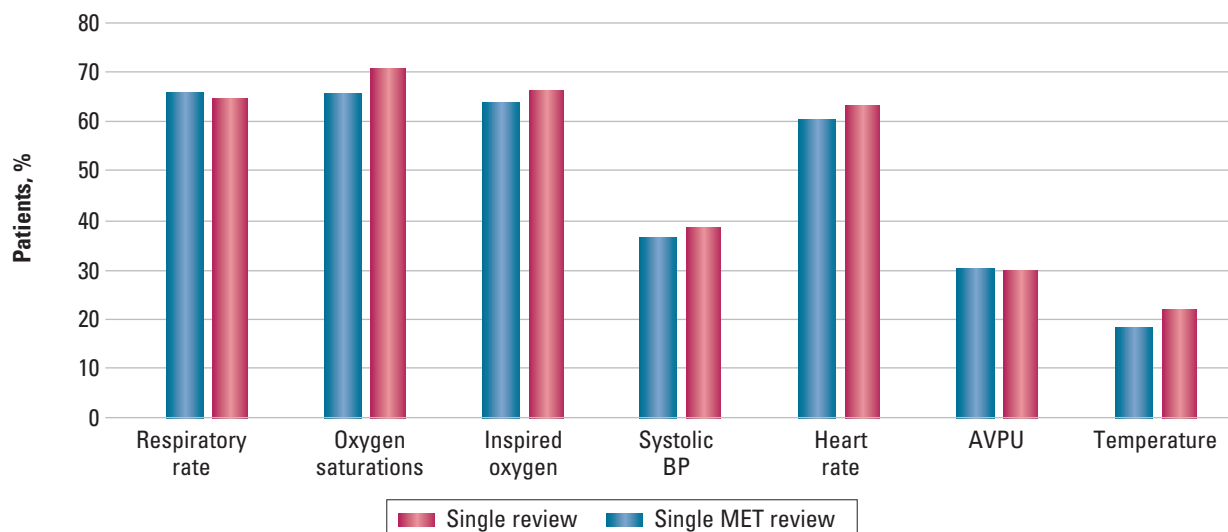

**Figure** Comparison of triggers for a call to the medical emergency team (MET) for patients who had 1 MET review and those who had multiple MET reviews.

Abbreviations: AVPU, alert, verbal, pain, unresponsive; BP, blood pressure.

the EWS. The most frequent triggers were respiratory-related categories. We found no significant difference in the triggers between groups (see Figure). Patients who required another MET review were significantly more likely to receive antibiotics (22%) than those who required only a single review (15%). No significant differences emerged regarding the amount of time members of the MET spent with patients from either of these groups: physicians spent 41.9 minutes with patients who had 1 MET call and 37.9 minutes with patients with multiple MET calls ( $t = .98$ ;  $P > .05$ ), and nurses spent 36.4 minutes and 37.2 minutes, respectively ( $t = .19$ ;  $P > .05$ ).

Patients requiring multiple MET calls demonstrated higher mortality than those who had 1 MET call during the admission (odds ratio [OR] 1.49 [95% CI 1.12-1.98]; Table 6). This risk of higher mortality associated with multiple MET calls still existed after controlling for transfer to an HLCB after the first MET call (OR 1.56 [95% CI 1.17-2.08]).

Table 4 presents the 2 logistic regression models: one with the all patients (model 1) and one with patients who were not categorized as having an LOMT after the first MET call (model 2). Both of these models were statistically significant. Table 5 presents the goodness of fit statistics of the logistic regression models. More surgical patients than medical patients were categorized as having multiple MET calls, but this was not statistically

significant in either the bivariate or the multivariate analysis. The bivariate analysis indicated that patients with multiple reviews were more likely to be prescribed antibiotics and receive respiratory interventions at the first MET review. Logistic regression identified that these 2 interventions were significant predictors of a subsequent MET call, after controlling for specialty and transfer to an HLCB bed after the first review. Controlling for specialty and interventions during the first review, we found that patients who were admitted to an HLCB after the first MET call had a lower OR of requiring further reviews by the MET. This was true for model 2, which excluded patients who were classified as having an LOMT.

## Discussion

This study compared patients who required a single MET call with those who required multiple MET calls during a single admission. Overall, the findings demonstrate little demographic difference between these 2 groups of patients. Similarly, the types of triggers that alerted the MET team did not differ between the groups. The percentage of patients who had multiple MET calls in this study—21% (260 of 1252) of patients—was lower than that in some studies<sup>22,26</sup> but higher than that in others.<sup>17,19,20</sup> In this study, and in a study by Mullins and Psirides,<sup>19</sup> surgical patients were more likely than medical

patients to require multiple reviews by the MET. A recent Irish study outlined the concerns of nurses and physicians that the Irish national EWS did not correlate well with patients who were “day 0” postoperatively.<sup>12</sup> Furthermore, Australian surgical nurses identified that their patients often had a high EWS during the immediate postoperative period, thus requiring a review by the MET.<sup>27</sup> In contrast, other investigators found that the EWS identified deterioration (death or unplanned ICU admission) equally well in emergency medical and surgical patients.<sup>28</sup> These findings suggest that more research examining surgical patients is warranted. In our study, the hospital’s MET database identified patients as only surgical or medical. Neither this study nor that by Fernando et al<sup>20</sup> could determine whether the MET review occurred before or after a surgical procedure, or if the patient had emergency or elective surgery.

In this study, we found that respiratory interventions and antibiotics at the first MET review were significant predictors of patients requiring multiple reviews, after controlling for specialty and transfer to an HLCB; this finding is similar to those of other studies.<sup>29</sup> These respi-

ratory interventions were provided in the ward setting. Health care providers

**We found that respiratory interventions and antibiotics at the first MET review were significant predictors of patients requiring multiple reviews.**

likely made the decision to provide these interventions as first-line measures in an attempt to avoid need for admission to an HLCB. If these first-line measures were unsuccessful and a patient required invasive ventilation, the patient would need to be transferred to an HLCB.

Ireland is experiencing a shortage of critical care beds, and recent reports have identified a need to increase the number of critical care beds by 45%.<sup>30,31</sup> Our study does not provide enough data on whether the availability of a critical care bed influenced the decision to transfer a patient to an HLCB. A higher percentage (20%) of patients were transferred to an HLCB after the initial MET call compared with 15% in an Australian study.<sup>16</sup> In a recent systematic review of the outcomes of MET calls, researchers found that a lower percentage (8.3%-27.0%) of patients in Australia were admitted to an HLCB than patients in US studies (23%-56%).<sup>32</sup> Currently, in the setting where our study was conducted, a critical care outreach nurse led service reviews of all patients

after their discharge from an HLCB, which may be why this group of patients had a lower rate of second review by the MET. Further research is required to ascertain whether routine follow-up of every patient by the critical care outreach service after the initial MET review would reduce the number of patients who require multiple MET reviews and prevent further deterioration of this cohort.

In a recent Irish study conducted in a hospital without a dedicated MET as part of the escalation protocol, investigators reported that nurses expressed concern about the delayed medical response to patients with a high EWS.<sup>33</sup> National guidelines for an EWS were developed in 2017 in the United Kingdom, and they recommend urgent review of patients who have a national EWS of 7 by staff who have critical care competencies.<sup>34</sup> Hegarty et al<sup>10</sup> concur with this recommendation. In organizations using track and trigger systems, barriers to introducing a MET as part of the escalation protocol include lack of resources and fear that the clinical governance/ownership of the deteriorating patient will transfer from the primary care team to the MET.<sup>35-37</sup>

Fernando et al<sup>20</sup> found that MET activation had been delayed at least 1 hour for patients who had multiple MET reviews. We did not collect data on delays in MET activation. Previous research has identified that junior nurses, agency nurses, and student nurses were perceived as less likely to escalate care after identifying a high EWS.<sup>38,39</sup> Critical care outreach services provide education and support to nurses caring for deteriorating patients at the bedside.<sup>40</sup> Nurses need to recognize that some patients may require multiple reviews by the MET—the prevalence varies from 11% to 26%.<sup>16,18</sup> Both nursing and medical staff must also be aware of the high mortality associated with patients who have multiple reviews by a MET.

In this study, we examined data collected as part of routine care in 1 hospital, and even though the sample size is robust, the collection of data from only a single site limits the generalizability of the findings. The hospital routinely reviews all data on MET calls and the events preceding every cardiac arrest, as recommended in the national guidelines.<sup>6</sup> At the time of data collection, electronic patient records were not used at the study site. Thus, we relied primarily on paper records manually recorded by the MET team, which the MET coordinator had collected and collated, to obtain data relating to MET calls. Because of the emergency nature of MET calls and



the laborious process clinical staff complete to collect data, some data were not recorded at the time of call; when possible, however, records were completed retrospectively. Consequently, some information was not available for consideration. The data files also did not differentiate whether the trigger was hypotension or hypertension. We did not capture the point at which the initial MET call was triggered for surgical patients (ie, preoperatively, on “day 0” postoperatively, or later during their hospital stay). We also do not know whether the MET call was a result of early or late postoperative complications or was due to a preexisting condition that was exacerbated by surgery. Specific details on the amount of time between surgery and the initial MET call could provide valuable information on possible opportunities to prevent subsequent triggers of MET calls from occurring among surgical patients.

During this study, a nationally approved sepsis screening tool was in use at the hospital to support staff in recognizing and managing sepsis.<sup>41</sup> However, data were not recorded to identify whether the implementation of the Sepsis Six protocol was associated with patients requiring multiple reviews by the MET. Likewise, neither time spent awaiting an HLCB after a MET call nor HLCB availability was recorded, and therefore we could not ascertain whether, because of bed shortages, patients who required an HLCB needed to be treated on the ward and subsequently required multiple MET reviews. Introduction of the Irish National ICU Audit will help hospitals identify whether patients in different hospitals are waiting for long periods for a critical care bed.<sup>42</sup>

Several continuous quality improvements have been implemented since we completed this study, including additional education for registered nurses on noninvasive ventilation, sepsis, and how to recognize and manage acutely ill adults. Protocols on the use of noninvasive ventilation have been developed and implemented. The findings of this study have informed how critical care outreach nurses prioritize reviews of patients who have been identified as being at increased risk of deterioration.

## Relevance to Clinical Practice

A greater understanding of the pathways of patients who experience multiple MET reviews will inform clinical decision-making. Nurses activate the MET according to hospital-specific criteria, and as the activators of MET reviews, they need to be aware of patients who have a

high risk of requiring multiple MET reviews and ultimately a high risk of mortality. Hospitals need to monitor the prevalence of patients requiring multiple MET reviews. Such data may lead to changes in policies and procedures regarding MET activation and response, leading to earlier interventions both before and after an initial MET review. Doing so may reduce the prevalence of multiple MET calls for these patients and improve their outcomes.

## Conclusion

In this retrospective cohort study, patients requiring multiple MET reviews had higher mortality than those requiring only 1 review. Guidelines from both Ireland<sup>6</sup> and the United Kingdom<sup>34</sup> identify the need to audit implementation of the EWS. Relatedly, our study highlights the need for hospitals to record more data during their audits of MET calls, including whether the patient had an elective or an emergency procedure and the number of days after the procedure the MET call occurred. Recommendations for auditing EWSs do not currently include these variables.<sup>6,43</sup> The National Clinical Effectiveness Committee in

Ireland is presently reviewing the EWS guidelines

and should include these surgical variables in its revised guidelines, which would allow for comparisons of surgical patients receiving elective procedures and those undergoing nonelective procedures. Capture and analysis of these additional data may inform more timely, focused care for surgical patients who are at a high risk of deteriorating. Such findings could also determine whether an EWS of 7 is appropriate for activating the MET, or whether recognition and treatment of deterioration should begin earlier, at a lower EWS. Ongoing audit of MET activation will evaluate current quality improvement initiatives and thus enhance the identification and management of deteriorating adult patients. **CCN**

### Acknowledgments

The views expressed in the submitted article are the authors' own and not an official position of the institutions involved.

### Financial Disclosures

None reported.

**Ongoing audit of MET activation will evaluate current quality improvement initiatives and enhance the identification and management of deteriorating adult patients.**

## See also

To learn more about rapid response teams, read "Rapid Response Team Calls and Unplanned Transfers to the Pediatric Intensive Care Unit in a Pediatric Hospital" by Humphreys and Totapally in the *American Journal of Critical Care*, 2016;25(1):e9-e13. Available at [www.ajconline.org](http://www.ajconline.org).

## References

- Jones DA, DeVita MA, Bellomo R. Rapid-response teams. *N Engl J Med*. 2011;365(2):139-146.
- White K, Scott I, Vaux A, Sullivan C. Rapid response teams in adult hospitals: time for another look? *Intern Med J*. 2015;45(12):1211-1220.
- Smith DJ, Aitken LM. Use of a single parameter track and trigger chart and the perceived barriers and facilitators to escalation of a deteriorating ward patient: a mixed methods study. *J Clin Nurs*. 2016;25(1-2):175-185.
- Gao H, McDonnell A, Harrison DA, et al. Systematic review and evaluation of physiological track and trigger warning systems for identifying at-risk patients on the ward. *Intensive Care Med*. 2007;33(4):667-679.
- Downey CL, Tahir W, Randell R, Brown JM, Jayne DG. Strengths and limitations of early warning scores: a systematic review and narrative synthesis. *Int J Nurs Stud*. 2017;76:106-119.
- National Clinical Effectiveness Committee. *National Early Warning Score: National Clinical Guideline No. 1*. Ireland Department of Health; 2014.
- National Clinical Effectiveness Committee. *Irish Maternity Early Warning System (IMEWS) Version 2: National Clinical Guideline No. 4*. Ireland Department of Health; 2019.
- National Clinical Effectiveness Committee. *The Irish Paediatric Early Warning System (PEWS): National Clinical Guideline No. 12*. Ireland Department of Health; 2016.
- Neary PM, Regan M, Joyce MJ, McAnena OJ, Callanan I. National early warning score (NEWS) – evaluation in surgery. *Int J Health Care Qual Assur*. 2015;28(3):245-252.
- Hegarty J, Drummond F, Murphy A, et al. *A systematic Review of the Clinical & Economic Literature and a Budget Impact Analysis of Any New Guideline Recommendations to Inform the Planned Update of National Clinical Guideline No. 1—National Early Warning Score (NEWS) for the Irish Health System*. National Clinical Effectiveness Committee, Ireland Department of Health; 2016.
- Cross G, Bilgrami I, Eastwood G, et al. The epidemiology of sepsis during rapid response team reviews in a teaching hospital. *Anaesth Intensive Care*. 2015;43(2):193-198.
- Davis DP, Aguilar SA, Graham PG, et al. A novel configuration of a traditional rapid response team decreases non-intensive care unit arrests and overall hospital mortality. *J Hosp Med*. 2015;10(6):352-357.
- Maharaj R, Raffaele I, Wendon J. Rapid response systems: a systematic review and meta-analysis. *Crit Care*. 2015;19(1):254.
- Barbetti J, Lee G. Medical emergency team: a review of the literature. *Nurs Crit Care*. 2008;13(2):80-85.
- Buist MD, Moore GE, Bernard SA, Waxman BP, Anderson JN, Nguyen TV. Effects of a medical emergency team on reduction of incidence of and mortality from unexpected cardiac arrests in hospital: preliminary study. *BMJ*. 2002;324(7334):387-390.
- Schneider AG, Warrillow S, Robbins R, Jones DA, Bellomo R. An assessment of the triage performance of the efferent arm of the rapid response system. *Resuscitation*. 2013;84(4):477-482.
- Sorensen EM, Petersen JA. Performance of the efferent limb of a rapid response system: an observational study of medical emergency team calls. *Scand J Trauma Resusc Emerg Med*. 2015;23:69.
- Psirides AJ, Hill J, Jones D. Rapid response team activation in New Zealand hospitals—a multicentre prospective observational study. *Anaesth Intensive Care*. 2016;44(3):391-397.
- Mullins CF, Psirides A. Activities of a medical emergency team: a prospective observational study of 795 calls. *Anaesth Intensive Care*. 2016;44(1):34-43.
- Fernando SM, Reardon PM, Scales DC, et al. Prevalence, risk factors, and clinical consequences of recurrent activation of a rapid response team: a multicenter observational study. *J Intensive Care Med*. 2019;34(10):782-789.
- Stelfox HT, Bagshaw SM, Gao S. Characteristics and outcomes for hospitalized patients with recurrent clinical deterioration and repeat medical emergency team activation. *Crit Care Med*. 2014;42(7):1601-1609.
- Calzavacca P, Licari E, Tee A, et al. Features and outcome of patients receiving multiple medical emergency team reviews. *Resuscitation*. 2010;81(11):1509-1515.
- STROBE Statement. Strengthening the reporting of observational studies in epidemiology. Accessed April 19, 2021. <https://www.strobe-statement.org/index.php?id=available-checklists>
- Hosmer DW, Lemeshow S, Sturdivant RX. *Applied Logistic Regression*. Wiley; 2013.
- Petrie A, Sabin C. *Medical Statistics at a Glance*. 3rd ed. Wiley-Blackwell; 2009.
- Smith RJ, Santamaria JD, Faraone EE, Holmes JA, Reid DA, Tobin AE. The duration of hospitalization before review by the rapid response team: a retrospective cohort study. *J Crit Care*. 2015;30(4):692-697.
- Mohammed Iddrisu S, Hutchinson AF, Sungkar Y, Considine J. Nurses' role in recognising and responding to clinical deterioration in surgical patients. *J Clin Nurs*. 2018;27(9-10):1920-1930.
- Kovacs C, Jarvis SW, Prytherch DR, et al. Comparison of the National Early Warning Score in non-elective medical and surgical patients. *Br J Surg*. 2016;103(10):1385-1393.
- Stelfox HT, Bagshaw SM, Gao S. A retrospective cohort study of age-based differences in the care of hospitalized patients with sudden clinical deterioration. *J Crit Care*. 2015;30(5):1025-1031.
- Prospectus Strategy Consultants. *Towards Excellence in Critical Care: Review of Adult Critical Care Services in the Republic of Ireland*. Irish Health Service Executive; 2009.
- Health Service Executive. *Right Care, Right Now: Model of Care for Adult Critical Care*. National Clinical Programme for Critical Care. Irish Health Service Executive; 2014.
- Tirkkonen J, Tamminen T, Skrifvars MB. Outcome of adult patients attended by rapid response teams: a systematic review of the literature. *Resuscitation*. 2017;112(suppl C):43-52.
- Fox A, Elliott N. Early warning scores: a sign of deterioration in patients and systems. *Nurs Manage*. 2015;21(1):26-31.
- Royal College of Physicians. *National Early Warning Score (NEWS) 2: Standardising the Assessment of Acute-Illness Severity in the NHS*. Royal College of Physicians; 2017.
- Currey J, Allen J, Jones D. Critical care clinician perceptions of factors leading to medical emergency team review. *Aust Crit Care*. 2018;31(2):87-92.
- Connolly F, Byrne D, Lydon S, Walsh C, O'Connor P. Barriers and facilitators related to the implementation of a physiological track and trigger system: a systematic review of the qualitative evidence. *Int J Qual Health Care*. 2017;29(8):973-980.
- Lyons PG, Edelson DP, Churpek MM. Rapid response systems. *Resuscitation*. 2018;128:191-197.
- McGaughey J, O'Halloran P, Porter S, Trinder J, Blackwood B. Early warning systems and rapid response to the deteriorating patient in hospital: a realist evaluation. *J Adv Nurs*. 2017;73(12):3119-3132.
- Foley C, Dowling M. How do nurses use the early warning score in their practice? A case study from an acute medical unit. *J Clin Nurs*. 2019;28(7-8):1183-1192.
- Pedersen A, Psirides A, Coombs M. Models and activities of critical care outreach in New Zealand hospitals: results of a national census. *Nurs Crit Care*. 2016;21(4):233-242.
- National Clinical Effectiveness Committee. *Sepsis Management: National Clinical Guideline No. 6*. Ireland Department of Health; 2016.
- National Office of Clinical Audit. *Irish National ICU Audit: Annual Report 2017*. National Office of Clinical Audit; 2019.
- Peberdy MA, Cretikos M, Abella BS, et al; International Liaison Committee on Resuscitation; American Heart Association; Australian Resuscitation Council; European Resuscitation Council; Heart and Stroke Foundation of Canada; InterAmerican Heart Foundation; Resuscitation Council of Southern Africa; New Zealand Resuscitation Council; American Heart Association Emergency Cardiovascular Care Committee; American Heart Association Council on Cardiopulmonary, Perioperative, and Critical Care; Interdisciplinary Working Group on Quality of Care and Outcomes Research. Recommended guidelines for monitoring, reporting, and conducting research on medical emergency team, outreach, and rapid response systems: an Utstein-style scientific statement: a scientific statement from the International Liaison Committee on Resuscitation (American Heart Association, Australian Resuscitation Council, European Resuscitation Council, Heart and Stroke Foundation of Canada, InterAmerican Heart Foundation, Resuscitation Council of Southern Africa, and the New Zealand Resuscitation Council); the American Heart Association Emergency Cardiovascular Care Committee; the Council on Cardiopulmonary, Perioperative, and Critical Care; and the Interdisciplinary Working Group on Quality of Care and Outcomes Research. *Circulation*. 2007;116(21):2481-2500.
